# Supplementary material for: In silico off-target profiling for enhanced drug safety assessment
Source: PubMed Central journal article supplement — Acta Pharm Sin B. 2024 Mar 6;14(7):2927–41. doi: 10.1016/j.apsb.2024.03.002 (PMC11252485; doi:10.1016/j.apsb.2024.03.002), 2024-03-06
Supplement: mmc1.pdf [file mmc1.pdf]

## Supporting Information for

### Tools

#### ***In silico* off-target profiling for enhanced drug safety assessment**

Jin Liu<sup>a,b,†</sup>, Yike Gui<sup>d,b,†</sup>, Jingxin Rao<sup>b,c</sup>, Jingjing Sun<sup>b,c</sup>, Gang Wang<sup>b,c</sup>, Qun Ren<sup>d,b</sup>, Ning Qu<sup>b,c</sup>, Buying Niu<sup>b,c</sup>, Zhiyi Chen<sup>e,b,c</sup>, Xia Sheng<sup>b,c</sup>, Yitian Wang<sup>b,c</sup>, Mingyue Zheng<sup>a,b,c,d,e,\*</sup>, Xutong Li<sup>b,c,\*</sup>

<sup>a</sup> *College of Pharmaceutical Sciences, Zhejiang University, Hangzhou 310058, China*

<sup>b</sup> *Drug Discovery and Design Center, State Key Laboratory of Drug Research, Shanghai Institute of Materia Medica Chinese Academy of Sciences, Shanghai 201203, China*

<sup>c</sup> *University of Chinese Academy of Sciences, Beijing 100049, China*

<sup>d</sup> *Nanjing University of Chinese Medicine, Nanjing 210023, China*

<sup>e</sup> *School of Pharmaceutical Science and Technology, Hangzhou Institute for Advanced Study, Hangzhou 330106, China*

<sup>†</sup>These authors made equal contributions to this work.

Received 28 November 2023; received in revised form 21 February 2024; accepted 29 February 2024

\*Corresponding authors.

E-mail addresses: [myzheng@simm.ac.cn](mailto:myzheng@simm.ac.cn) (Mingyue Zheng), [lixutong@simm.ac.cn](mailto:lixutong@simm.ac.cn) (Xutong Li).

## Supporting Information of Contents

**Text S1.** Establishment of off-target panel.

**Text S2.** Compound-protein interaction data collection and processing.

**Text S3.** Principles of enrichment analysis.

**Text S4.** Introduction of MLKNN and the data splitting method for ATC classification.

**Text S5.** Introduction of LightGBM, data processing and hyperparameter search.

**Text S6.** Drug-ADR data collection and establishment of ADR prediction model.

**Text S7.** Drug-target-network analysis of Sertindole.

**Text S8.** Molecular docking using Schrödinger software.

**Fig. S1.** Physico-chemical spatial distribution of positive molecules and relative decoys under different target classes.

**Fig. S2.** Establishing ADR-targets mappings.

**Fig. S3.** Performance comparison of four off-target prediction models across all targets on AUROC, MCC, BACC, and F1 metrics.

**Fig. S4.** Number of significantly enriched ADRs for three drugs under different thresholds.

**Fig. S5.** Drug-target-ADR association diagram for Sertindole.

**Table S2.** List of databases used in the work.

**Table S3.** Activity thresholds corresponding to different types of targets.

**Table S4.** Hyperparameter search range for MTGNN.

**Table S5.** Hyperparameter settings of models corresponding to seven target types.

**Table S6.** Parameter settings of Roche's off-target prediction model in the work.

**Table S7.** Model performance of different off-target prediction models under different target types.

**Table S8.** Comparison between multitask off-target prediction models and benchmark models for drug-target interaction prediction.

**Table S9.** Drug data statistics under the first-level ATC code.

**Table S10.** Comparison of model performance between MLKNN and its ablation experiment for ATC classification.

**Table S11.** The hyperparameter search range and optimal settings of LightGBM and ECFP\_LightGBM for toxicity prediction.

**Table S12.** Comparison of LightGBM with other toxicity prediction models.

**Table S13.** Drugs and their associated ADRs.

**Table S18.** Comparison of ML-based ADR prediction models.

**Table S19.** Molecular docking scores (kcal/mol) for pergolide and sertindole.

### **Text S1.** Establishment of off-target panel

In vitro analyzing of candidate drugs against a wide range of targets is an important component of the compound selection process. Compared to screening compounds on known therapeutic targets, promiscuous screening (off-target screening) of compounds is challenging due to the lack of boundaries. Conducting extensive screening on numerous targets can be cost-prohibitive and it may be challenging to predict the relevance of compound-target interactions [1]. To mitigate these challenges, major pharmaceutical companies such as AstraZeneca, GlaxoSmithKline, Novartis, and Pfizer have established internal off-target panels for screening compounds, which reduce the number of molecules tested in subsequent assays. Based on the targets established by these companies, Bowes et al. proposed 44 early drug safety targets that include the toxicity of the central nervous system, immune system, gastrointestinal tract, and heart [2]. AbbVie obtained 70 safety-related targets via a literature search, most of which are included in Eurofins' testing panel [3]. To obtain an optimized target panel, Roche utilized experimental data based on the Bioprint® database [4] and employed a statistical ranking method, resulting in a panel of 50 safety targets [1]. Combining the above targets, we can get an off-target panel containing 90 targets. This panel comprises 50 G protein-coupled receptor protein-related targets, 16 Ion channel-related targets, 9 Enzyme-related receptors, 6 Kinase-related targets, 4 Nuclear receptor-related targets, 4 Transporter-related targets and two other targets.

### **Text S2.** Compound-protein interaction data collection and processing

The data collection and processing process for the ChEMBL database is below, and the PubChem database is collected similarly. According to the gene names of the targets, the steps to collect the corresponding compounds under the corresponding targets from UniProt and ChEMBL databases are as follows:

1. The Retrieve/ID mapping module in UniProt was utilized to convert gene names of safety targets to UniProtKB/Swiss Prot identifiers. The UniProt IDs assigned to this entry were manually annotated with high credibility and low redundancy. The organisms mainly selected were Human, Rat, and Mouse.
2. The corresponding ChEMBL ID in the ChEMBL database (Release 30) was obtained based on the UniProt ID of the safety target.
3. Relevant data was retrieved from the ChEMBL database using PostgreSQL, a powerful relational database management system (RDBMS) that supports crawling data from databases based on filtering conditions. The data filtering condition set for this task is:

(1) target\_type = 'SINGLE PROTEIN'

The target types that ChEMBL supports include single protein, protein complex, and protein family. Here, we had chosen single protein.

(2) molecule\_type = 'Small molecule'

The selectable molecule types in ChEMBL include oligosaccharides, proteins, small molecules, etc. Here we chose small molecule.

(3) assay\_type IN 'B','F'

There are multiple experimental categories supported by ChEMBL, and we had chosen to use the binding ('B') and function ('F') data.

(4) confidence\_score = 9

ChEMBL assigns confidence scores to the assay-to-target relationships, reflecting the

reliability of a specific experimental result for a given target type. The scores range from 0 to 9, with a minimum confidence of 4 for known protein targets. We only selected confidence score of 9, ensuring precise experimental data for individual protein targets.

Activity thresholds were determined based on the target protein family, using the guidelines provided by the Illuminating the Druggable Genome consortium (IDG) (<https://druggablegenome.net/ProteinFam>) [5]. The specific thresholds for each protein family are summarized in Supporting Information Table S3.

**Text S3.** Principles of enrichment analysis

The *p-value* is the probability of obtaining the observed sample results, or more extreme results, when the null hypothesis is true. If the *p-value* is very small, it indicates that the probability of such a situation occurring is very low. If it does occur, according to the principle of small probability, we have reason to reject the null hypothesis. The smaller the *p-value* is, the more sufficient our reason to reject the null hypothesis, meaning our results are more significant. In our enrichment analysis, the *p-value* is calculated using the following formula:

$$p - value = \sum_{i=m}^M \frac{\binom{M}{i} * \binom{N-M}{n-i}}{\binom{N}{n}} = 1 - \sum_{i=0}^{m-1} \frac{\binom{M}{i} * \binom{N-M}{n-i}}{\binom{N}{n}} \quad (1)$$

In Eq. (1), the denominator is the process of binding  $n$  targets from a total of  $N$  targets for drugs. The numerator is  $M$  targets denoting the number of targets belonging to the specific ADR term, of which,  $i$  is predicted as positive targets for the drug. The *p-value* refers to the sum of probabilities of observing  $m$  targets in a certain ADR term or more extreme results, so  $i$  ranges from  $m$  to  $M$ . This represents all possibilities of seeing more targets fall into this ADR term. As the number of hypothesis tests increases, the probability of making error decisions rapidly increases. To control the false positive rate, we have performed multiple hypothesis testing correction, namely *FDR* (False Discovery Rate, *FDR*) correction (Eq. (2)) which is based on Bonferroni correction. Multiple testing correction adjusts each *p-value* to keep the overall error rate less than or equal to the user-specified *p-cutoff value*.

$$FDR = 1 - precision = \frac{FP}{(TP + FP)} \quad (2)$$

**Text S4.** Introduction of MLKNN and the data splitting method for ATC classification

Multi-label learning algorithms can be roughly divided into two categories: transformation algorithms and adaptive algorithms. Here, we used an adaptive algorithm, multi-label k-nearest neighbours (MLKNN), to perform multi-label classification [6, 7]. The MLKNN algorithm follows four steps: 1. Finding the K nearest samples to the input sample; 2. Counting the occurrences of each category in the K samples; 3. Utilizing a Bayesian algorithm with the statistics from step 2 to calculate the label probabilities; 4. Outputting class probabilities. In our project, we have a dataset of  $n$  drugs represented by  $\{(x_i, y_i)\}_{i=1}^n$ , where  $x_i$  and  $y_i$  are  $m$ -dimensional feature vectors and  $n$ -dimensional side effect vectors for drug  $i$ , respectively. MLKNN is used to model the relationship between feature vectors and side effect vectors, i.e.,  $Y = F(X): 2^m \rightarrow 2^n$ .

To conduct multi-label ATC classification, we processed the collected drug-ATC code pairs into a multi-label data format, where a single drug may correspond to multiple ATC code labels.

Initially, the test dataset was divided using the iterative hierarchical partitioning method of data in multi-label learning, implemented through the `iterative_train_test_split` function in `skmultilearn.model_selection`, with a scale of 0.1. The remaining data was subsequently split into five folds for cross-validation, yielding training and validation datasets for each fold.

**Text S5.** Introduction of LightGBM, data processing and hyperparameter search

LightGBM, in comparison to XGBoost, primarily adopts some optimization strategies to obtain superior performance in terms of prediction accuracy, model stability, and computational efficiency [8]:

- 1) Histogram-based decision tree algorithm, which constructs a histogram of width  $K$  by discretizing continuous floating-point eigenvalues to find the optimal segmentation point to reduce the computation.
- 2) Gradient-based One-Side Sampling (GOSS), which retains data instances with large gradients and randomly sampling instances with small gradients to reduce the data volume while maintaining the data distribution.
- 3) Exclusive Feature Bundling (EFB) algorithm, which achieves dimensionality reduction by bundling a set of mutually exclusive features into one feature.
- 4) Leaf-wise leaf growth strategy with depth restriction, which improves convergence speed by paying more attention to data with large errors, compared to the traditional level-wise growth strategy.

To conduct toxicity prediction, after data cleaning and deduplication, we obtained a total of 877 toxic compounds and 1229 non-toxic compounds where we labeled toxic drugs as 1, and non-toxic compounds as 0. We first divided the test set at a scale of 0.2. The remaining data was subsequently split into five folds for cross-validation, yielding training and validation datasets for each fold. Different models were evaluated on the same test set.

Optuna is a hyperparameter optimization framework for automated hyperparameter search that can be applied to machine learning and deep learning models [9]; Optuna uses a sampling and pruning algorithm to optimize the hyperparameters, so it is very fast and efficient; it also dynamically constructs the hyperparameter search space in an intuitive way. We use Optuna here to select the best hyperparameters for the model. The hyperparameter settings of LightGBM and ECFP\_LightGBM are shown in Supporting Information Table S11.

**Text S6.** Drug-ADR data collection and establishment of ADR prediction model

The SIDER database (version 4.1, 2015) served as the primary source for drug-ADR data collection. We retained ADR information for 1178 drugs, focusing on frequently occurring ADRs with frequencies ranging from 0.01 to 1, utilizing Preferred Terms (PT)-level descriptions to prevent semantic redundancy. Consequently, we retained 2551 ADRs for 1178 drugs, where '1' represents drug-ADR interactions and '0' represents no interaction.

ADR prediction was conducted using a multi-label KNN model proposed by Zhang et al. [7], with input features being the predicted results of the off-target profiles or molecular ECFP4. For drug-ADR interaction data, the test dataset underwent division using the iterative hierarchical partitioning method of data in multi-label learning, implemented through the `iterative_train_test_split` function in `skmultilearn.model_selection`, with a scale of 0.1. Employing

a fixed test set, five-fold cross-validation was performed, and the best parameter combination obtained through hyper-parameter search was  $k=5$  and  $s=1$ , where  $k$  represents the number of neighbors in the KNN model, and  $s$  is a smoothing parameter. In each round of five-fold cross-validation, we calculated the optimal threshold for each ADR. The optimal threshold, determined based on the Youden Index [10], which serves as a summary measure of the receiver operating characteristic curve. It is the sum of sensitivity and specificity minus one. In binary classification, the Youden Index can be employed to select the optimal classification threshold. We applied the optimal threshold for each category to convert predicted probability values into binary classification labels, thereby obtaining the predicted relevant ADRs for each drug.

Besides multi-label models, for each ADR, an RF classifier was established to determine whether a compound possesses this ADR, with the off-target representation or ECFP4 serving as input features. The performance for these models is presented in Supporting Information Table S18.

#### **Text S7.** Drug-target-network analysis of Sertindole

Sertindole, an atypical antipsychotic utilized for schizophrenia treatment, faced market withdrawal in 1998 across multiple countries due to cardiotoxic side effects, including arrhythmias and sudden cardiac death. In Supporting Information Fig. S5, we identified nine known targets of Sertindole that overlap with our off-target panel. Notably, our off-target model successfully predicted eight of these targets, attaining binding probabilities exceeding 0.7. On the one hand, the predicted new targets can help explain the known ADRs of drugs. Our predictions suggest Sertindole's interaction with SLC6A4 and HTR7. Inhibiting SLC6A4 [11] or binding to HTR7 [12] could induce insomnia, thereby furnishing a rationale for insomnia induced by Sertindole usage. Hyperglycemia, an infrequent side effect of Sertindole, finds potential association in our projected outcomes with the newly predicted targets HTR3A [13] and ADRB2 [14]. On the other hand, the drug's known binding targets can explain related ADRs. Sertindole's potential interaction with the new target HRH3 carries an affiliation with sedation [15]. Although sedation is linked to Sertindole's known target ADRA2B [16] and HRH1 [17], the prominence of HRH3 in our forecasts intimates a mechanistic link between the drug and new off-targets. Cardiotoxicity-related side effects of Sertindole can be associated with the known target KCNH2 [18], ADRA2B, as well as predicted new targets such as CHRNA4 and SCN2A, etc.

#### **Text S8.** Molecular docking using Schrödinger software

Virtual screening was carried out using Maestro (Schrödinger Release 2023-1: Glide, Schrödinger, LLC, New York, NY, 2023). The crystal structures of the targets were retrieved from the Protein Data Bank (PDB), and the PDB IDs for the utilized targets are presented in Supporting Information Table S18. Protein preparation was performed using Maestro's Protein Preparation Wizard with the OPLS3e force field. The prepared protein served as the basis for generating grid files for molecular docking through the Receptor Grid Generation model. The center of the ligand was used to define the receptor grid box's center, allowing docked molecules to sample a  $10 \times 10 \times 10$  Å inner search space, with a 20 Å buffer in all directions. All other parameters remained at default settings.

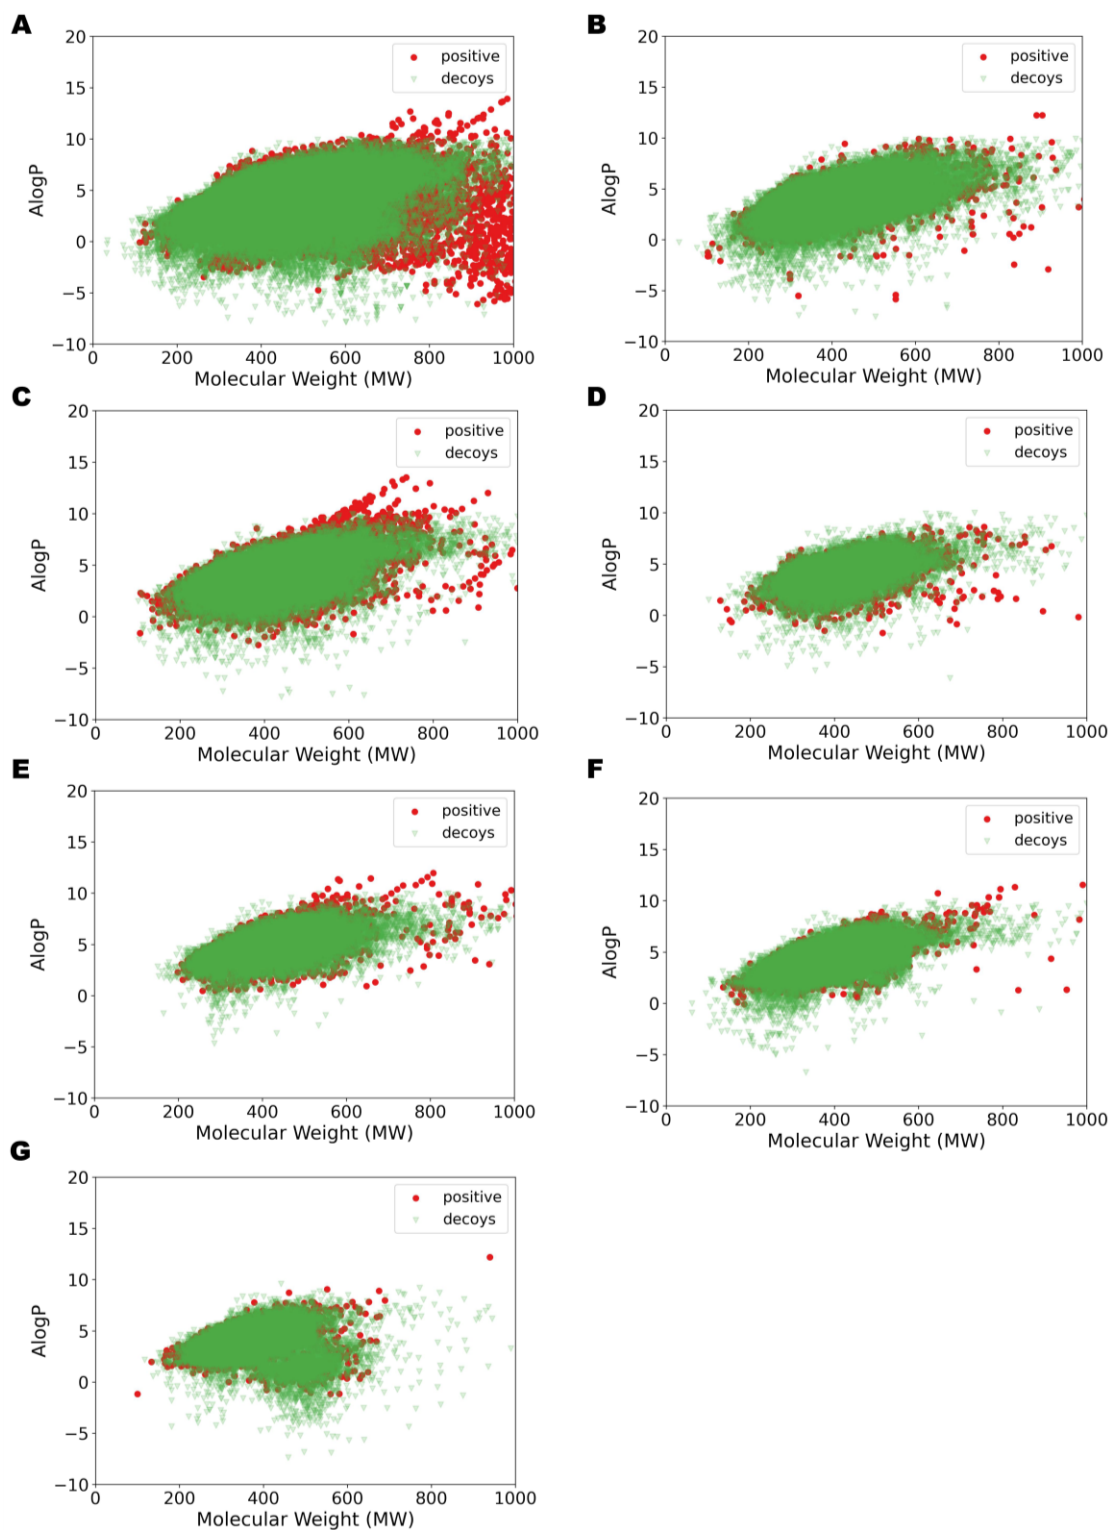

**Fig. S1.** Physico-chemical spatial distribution of positive molecules and relative decoys under different target classes. **(A)** GPCR. **(B)** Ion channel. **(C)** Enzyme. **(D)** Kinases. **(E)** Nuclear receptor. **(F)** Transporter. **(G)** Other targets.

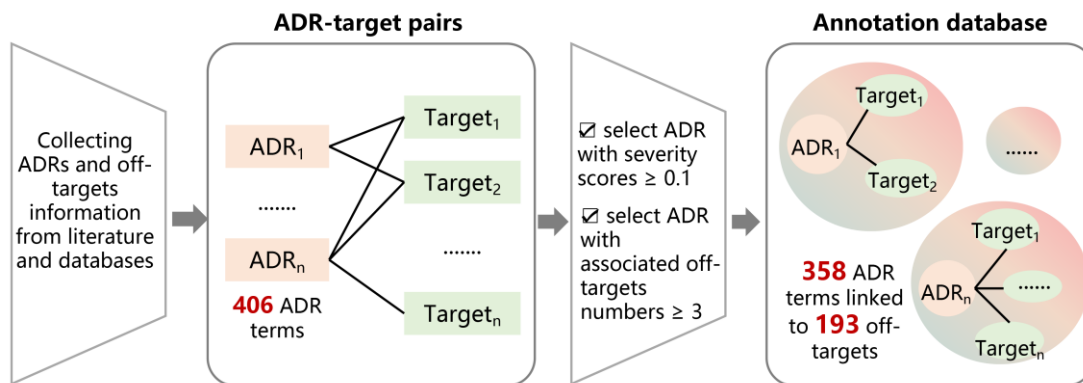

**Fig. S2.** Establishing ADR-targets mappings.

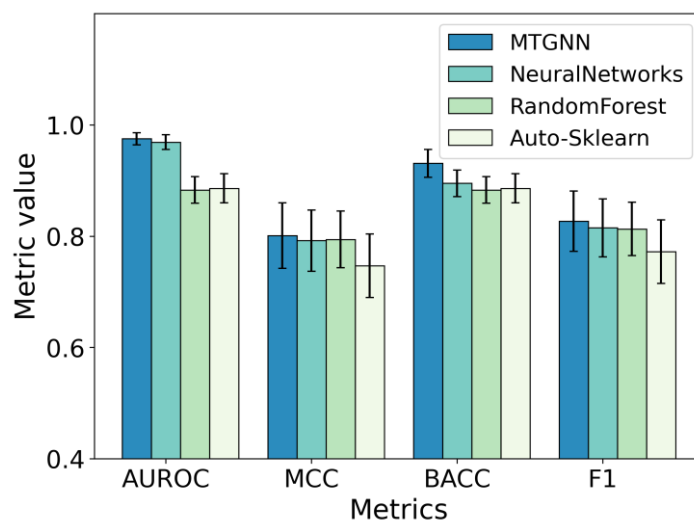

**Fig. S3.** Performance comparison of four off-target prediction models across all targets on AUROC, MCC, BACC, and F1 metrics.

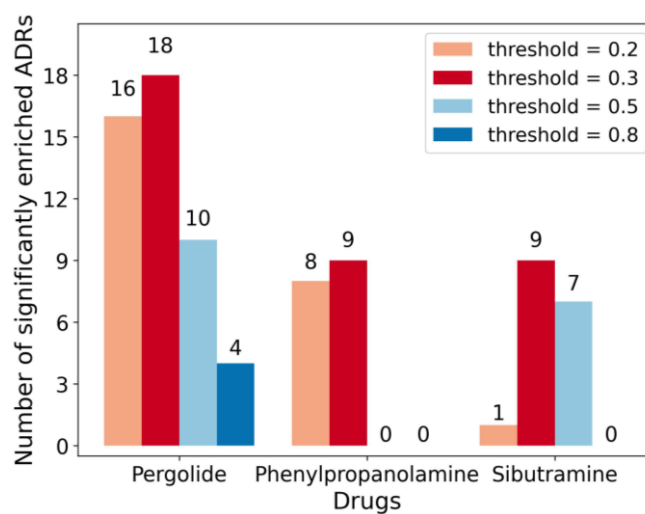

**Fig. S4.** Number of significantly enriched ADRs for three drugs under different thresholds. The horizontal axis represents drugs, the vertical axis represents the number of significantly enriched ADRs, and different colors indicate different thresholds.



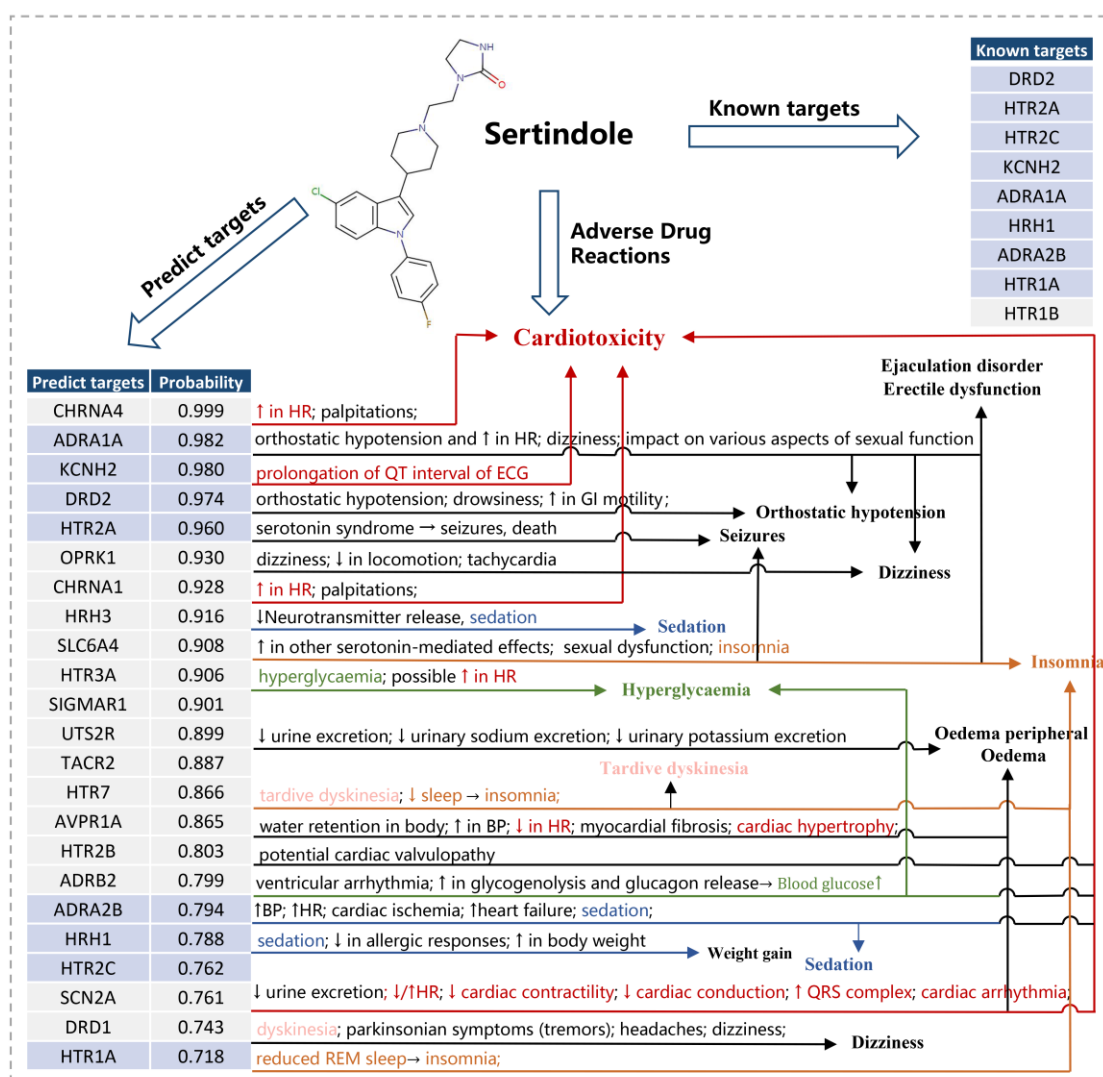

**Fig. S5.** Drug-target-ADR association diagram for Sertindole. Known targets in the figure are the known targets of the drug (obtained from databases such as ChEMBL, PubChem and DrugBank, which overlap with our off-target panel), Predict targets are the predicted off-targets, and probability is the predicted probability value. The targets with a blue background in the table are predicted targets that overlap with known targets. The side effect descriptions associated with each target are listed after it, and colored ADRs are associated with predicted new targets and correspond to the respective target's side effect description (e.g. Cardiotoxicity is marked in red, corresponding to “↓/↑HR”, “prolongation of QT interval of ECG”, “cardiac hypertrophy” and so on in the target's side effect description; Sedation is marked in blue, corresponding to “sedation” in the target's side effect description; Hyperglycaemia is marked in green, corresponding to “hyperglycaemia” and “Blood glucose ↑” in the target's side effect description). BP: blood pressure; HR: heart rate; GI: glycemic index; ECG: electrocardiography; QT: the time from the start of the Q wave to the end of the T wave, time taken for ventricular depolarisation and repolarisation.

**Table S2** List of databases used in the work

| Database | Description                                                                                                                                                                                                     | URL                                                                               | Reference |
|----------|-----------------------------------------------------------------------------------------------------------------------------------------------------------------------------------------------------------------|-----------------------------------------------------------------------------------|-----------|
| ChEMBL   | A manually curated database of biologically active molecules with drug-like properties. It brings together chemical, bioactive and genomic data to help translate genomic information into effective new drugs. | <a href="https://www.ebi.ac.uk/chembl/">https://www.ebi.ac.uk/chembl/</a>         | [19]      |
| PubChem  | An open chemical database provides information about molecules such as chemical structures, identifiers, chemical and physical properties, and biological activities.                                           | <a href="https://pubchem.ncbi.nlm.nih.gov/">https://pubchem.ncbi.nlm.nih.gov/</a> | [20]      |
| DrugBank | A web-based database that provides extensive molecular information on drugs, including their mechanisms of action, interactions, and targets.                                                                   | <a href="http://www.drugbank.ca">http://www.drugbank.ca</a>                       | [21]      |
| SIDER    | A database that provides information on marketed drugs and their adverse reactions records.                                                                                                                     | <a href="http://sideeffects.embl.de">http://sideeffects.embl.de</a>               | [22]      |
| ZINC     | A free commercial compound database for virtual screening.                                                                                                                                                      | <a href="https://zinc15.docking.org/">https://zinc15.docking.org/</a>             | [23]      |

**Table S3** Activity thresholds corresponding to different types of targets

| Target type      | Active            | Inactive       |
|------------------|-------------------|----------------|
| GPCR             | $\leq 100$ nM     | $> 100$ nM     |
| Ion channel      | $\leq 10$ $\mu$ M | $> 10$ $\mu$ M |
| Enzyme           | $\leq 1$ $\mu$ M  | $> 1$ $\mu$ M  |
| Kinase           | $\leq 1$ $\mu$ M  | $> 1$ $\mu$ M  |
| Transporter      | $\leq 1$ $\mu$ M  | $> 1$ $\mu$ M  |
| Nuclear receptor | $\leq 100$ nM     | $> 100$ nM     |
| Others           | $\leq 1$ $\mu$ M  | $> 1$ $\mu$ M  |

**Table S4** Hyperparameter search range for MTGNN

| Hyperparameter name | Search Range                             |
|---------------------|------------------------------------------|
| num_layers          | [1, 2, 3, 4, 5, 6, 7, 8, 9]              |
| num_timesteps       | [1, 2, 3, 4, 5, 6, 7, 8, 9]              |
| graph_feat_size     | [100, 200, 300, 400, 500, 600, 700, 800] |
| learning_rate       | [0.005, 0.0001, 0.00005]                 |
| batch_size          | [64, 128, 256]                           |
| weight_decay        | [0.0, 1e-7, 1e-5]                        |

**Table S5** Hyperparameter settings of models corresponding to seven target types

|             | <b>n_layers</b> | <b>n_timesteps</b> | <b>graph_feat_size</b> | <b>learning_rate</b> | <b>batch_size</b> | <b>weight_decay</b> | <b>dropout</b> |
|-------------|-----------------|--------------------|------------------------|----------------------|-------------------|---------------------|----------------|
| GPCR        | 3               | 2                  | 200                    | 0.0001               | 128               | 0                   | 0.1            |
| Ion channel | 3               | 2                  | 200                    | 0.0001               | 128               | 0                   | 0.1            |
| Enzyme      | 1               | 4                  | 600                    | 0.0001               | 64                | 0                   | 0.1            |
| Kinase      | 3               | 2                  | 200                    | 0.0005               | 64                | 1e-7                | 0.1            |
| NR          | 3               | 2                  | 200                    | 0.0001               | 128               | 0                   | 0.1            |
| Transporter | 3               | 2                  | 200                    | 0.0005               | 64                | 0                   | 0.1            |
| others      | 3               | 2                  | 200                    | 0.0001               | 128               | 0                   | 0.1            |

**Table S6** Parameter settings of Roche's off-target prediction model in the work

| <b>Model</b>   | <b>Hyperparameter name</b> | <b>Hyperparameter search range<br/>/ hyperparameter setting</b> |
|----------------|----------------------------|-----------------------------------------------------------------|
| NeuralNetworks | Hidden units               | [256, 512, 1024, 2048]                                          |
|                | Dropout input              | [0, 0.1, 0.2]                                                   |
|                | Dropout hidden             | [0.2, 0.3, 0.4]                                                 |
|                | Learning rate              | [0.01, 0.001, 0.0001]                                           |
|                | Batch size                 | [64, 128, 256]                                                  |
|                | Hidden layers              | 2                                                               |
|                | Kernel regularizer l2      | 0.001                                                           |
| RandomForest   | n_estimators               | 100                                                             |
|                | min_samples_split          | 2                                                               |
|                | min_samples_leaf           | 1                                                               |
| Auto-Sklearn   | time_left_for_this_task    | 120                                                             |
|                | per_run_time_limit=30      | 30                                                              |

**Table S7** Model performance of different off-target prediction models under different target types

| Target type | Model          | AUROC         | MCC           | BACC          | F1            |
|-------------|----------------|---------------|---------------|---------------|---------------|
| GPCR        | MTGNN          | <b>0.9722</b> | 0.7686        | <b>0.9238</b> | 0.7994        |
|             | NeuralNetworks | 0.9665        | <b>0.7865</b> | 0.8954        | <b>0.8139</b> |
|             | RandomForest   | 0.8758        | 0.7766        | 0.8758        | 0.8028        |
|             | Auto-Sklearn   | 0.8987        | 0.7544        | 0.8987        | 0.7818        |
| Ion channel | MTGNN          | <b>0.9703</b> | <b>0.8158</b> | <b>0.9280</b> | <b>0.8420</b> |
|             | NeuralNetworks | 0.9685        | 0.8150        | 0.9022        | 0.8313        |
|             | RandomForest   | 0.8872        | 0.8133        | 0.8872        | 0.8252        |
|             | Auto-Sklearn   | 0.8936        | 0.7781        | 0.8936        | 0.7996        |
| Enzyme      | MTGNN          | <b>0.9657</b> | 0.7421        | <b>0.9080</b> | <b>0.7675</b> |
|             | NeuralNetworks | 0.9499        | 0.7198        | 0.8556        | 0.7424        |
|             | RandomForest   | 0.8559        | <b>0.7466</b> | 0.8559        | 0.7625        |
|             | Auto-Sklearn   | 0.8850        | 0.7124        | 0.8850        | 0.7404        |
| Kinase      | MTGNN          | <b>0.9679</b> | <b>0.7746</b> | <b>0.9113</b> | <b>0.8069</b> |
|             | NeuralNetworks | 0.9581        | 0.7555        | 0.8779        | 0.7822        |
|             | RandomForest   | 0.8484        | 0.7287        | 0.8484        | 0.7469        |
|             | Auto-Sklearn   | 0.8563        | 0.7083        | 0.8563        | 0.7341        |
| NR          | MTGNN          | 0.9656        | 0.7476        | <b>0.9179</b> | 0.7778        |
|             | NeuralNetworks | <b>0.9687</b> | <b>0.7487</b> | 0.8885        | <b>0.7793</b> |
|             | RandomForest   | 0.8853        | 0.7622        | 0.8853        | 0.7954        |
|             | Auto-Sklearn   | 0.8983        | 0.7508        | 0.8983        | 0.7831        |
| Transporter | MTGNN          | <b>0.9946</b> | <b>0.8926</b> | <b>0.9750</b> | <b>0.9074</b> |
|             | NeuralNetworks | 0.9858        | 0.8575        | 0.9198        | 0.8743        |
|             | RandomForest   | 0.9071        | 0.8625        | 0.9071        | 0.8748        |
|             | Auto-Sklearn   | 0.8481        | 0.6730        | 0.8481        | 0.6940        |
| others      | MTGNN          | <b>0.9870</b> | <b>0.8664</b> | <b>0.9547</b> | <b>0.8866</b> |
|             | NeuralNetworks | 0.9862        | 0.8625        | 0.9253        | 0.8839        |
|             | RandomForest   | 0.9197        | 0.8648        | 0.9197        | 0.8847        |
|             | Auto-Sklearn   | 0.9248        | 0.8495        | 0.9248        | 0.8721        |

**Table S8.** Comparison between multitask off-target prediction models and benchmark models for drug-target interaction prediction

| Target type | Model             | AUROC         | MCC           | BACC          | F1            |
|-------------|-------------------|---------------|---------------|---------------|---------------|
| GPCR        | MTGNN             | 0.9722        | 0.7686        | <b>0.9238</b> | <b>0.7994</b> |
|             | TransformerCPI2.0 | <b>0.9730</b> | <b>0.8016</b> | 0.8946        | 0.7555        |
|             | TransformerCPI    | 0.9654        | 0.7464        | 0.8874        | 0.7944        |
|             | GraphDTA          | 0.9474        | 0.6515        | 0.8544        | 0.7178        |
| Ion channel | MTGNN             | 0.9703        | <b>0.8158</b> | <b>0.9280</b> | <b>0.8420</b> |
|             | TransformerCPI2.0 | 0.9755        | 0.8102        | 0.9012        | 0.7760        |
|             | TransformerCPI    | <b>0.9769</b> | 0.7135        | 0.9006        | 0.7535        |
|             | GraphDTA          | 0.9475        | 0.6246        | 0.8534        | 0.6805        |
| Enzyme      | MTGNN             | 0.9657        | <b>0.7421</b> | <b>0.9080</b> | <b>0.7675</b> |
|             | TransformerCPI2.0 | <b>0.9673</b> | 0.7300        | 0.8791        | 0.6812        |
|             | TransformerCPI    | 0.9577        | 0.6924        | 0.8747        | 0.7410        |
|             | GraphDTA          | 0.9484        | 0.6539        | 0.8609        | 0.7084        |
| Kinase      | MTGNN             | 0.9679        | 0.7746        | <b>0.9113</b> | 0.8069        |
|             | TransformerCPI2.0 | <b>0.9787</b> | <b>0.8429</b> | 0.9067        | <b>0.8086</b> |
|             | TransformerCPI    | 0.9756        | 0.7382        | 0.8987        | 0.7849        |
|             | GraphDTA          | 0.9488        | 0.6498        | 0.8480        | 0.7146        |
| NR          | MTGNN             | 0.9656        | <b>0.7476</b> | <b>0.9179</b> | <b>0.7778</b> |
|             | TransformerCPI2.0 | <b>0.9700</b> | 0.7447        | 0.8807        | 0.6895        |
|             | TransformerCPI    | 0.9652        | 0.6989        | 0.8788        | 0.7535        |
|             | GraphDTA          | 0.9556        | 0.7259        | 0.8667        | 0.7755        |
| Transporter | MTGNN             | <b>0.9946</b> | <b>0.8926</b> | <b>0.9750</b> | <b>0.9074</b> |
|             | TransformerCPI2.0 | 0.9883        | 0.8473        | 0.9263        | 0.8139        |
|             | TransformerCPI    | 0.9934        | 0.7700        | 0.9386        | 0.8001        |
|             | GraphDTA          | 0.9839        | 0.7036        | 0.9080        | 0.7446        |
| others      | MTGNN             | 0.9870        | 0.8664        | 0.9547        | 0.8866        |
|             | TransformerCPI2.0 | 0.9947        | 0.9205        | 0.9562        | 0.9047        |
|             | TransformerCPI    | <b>0.9963</b> | <b>0.9301</b> | <b>0.9653</b> | <b>0.9417</b> |
|             | GraphDTA          | 0.9889        | 0.7556        | 0.9245        | 0.7912        |

**Table S9** Drug data statistics under the first-level ATC code

| Code                                  | Anatomical/Pharmacological Group                                | Drugs number |
|---------------------------------------|-----------------------------------------------------------------|--------------|
| A                                     | Alimentary tract and metabolism                                 | 453          |
| B                                     | Blood and blood-forming organs                                  | 103          |
| C                                     | Cardiovascular system                                           | 493          |
| D                                     | Dermatologicals                                                 | 352          |
| G                                     | Genito urinary system and sex hormones                          | 246          |
| H                                     | Systemic hormonal preparations, excl. sex hormones and insulins | 120          |
| J                                     | Antiinfectives for systemic use                                 | 476          |
| L                                     | Antineoplastic and immunomodulating agents                      | 336          |
| M                                     | Musculo-skeletal system                                         | 185          |
| N                                     | Nervous system                                                  | 612          |
| P                                     | Antiparasitic products, insecticides and repellents             | 115          |
| R                                     | Respiratory system                                              | 308          |
| S                                     | Sensory organs                                                  | 293          |
| V                                     | Various                                                         | 161          |
| The number of Drug-ATC pairs          |                                                                 | 4253         |
| The number of unique SMILES sequences |                                                                 | 3491         |

**Table S10** Comparison of model effects of MLKNN and its ablation experiment for ATC classification

|            | AUROC               | mAP                 | Rank loss           |
|------------|---------------------|---------------------|---------------------|
| MLKNN      | <b>0.609</b> ±0.009 | <b>0.376</b> ±0.009 | <b>0.377</b> ±0.006 |
| ECFP_MLKNN | 0.560±0.012         | 0.310±0.009         | 0.415±0.010         |

\* Values in the table are the mean ± variance of the five-fold cross-training

\* The best values of different metrics are bold

**Table S11** The hyperparameter search range and optimal settings of LightGBM and ECFP\_LightGBM for toxicity prediction

| Hyperparameter name | Search Range<br>[range1, range2, step] | Best Hyperparameter |               |
|---------------------|----------------------------------------|---------------------|---------------|
|                     |                                        | LightGBM            | ECFP_LightGBM |
| n_estimators        | [100, 1000, 100]                       | 900                 | 900           |
| learning_rate       | [0.1, 0.5, 0.05]                       | 0.2                 | 0.45          |
| num_leaves          | [20, 1000, 20]                         | 540                 | 940           |
| max_depth           | [3, 12, 1]                             | 6                   | 9             |
| min_data_in_leaf    | [100, 500, 100]                        | 100                 | 100           |
| lambda_l1           | [0, 100, 5]                            | 0                   | 0             |
| lambda_l2           | [0, 100, 5]                            | 0                   | 10            |
| min_gain_to_split   | [0, 15, 0.1]                           | 0.2                 | 0.0           |
| bagging_fraction    | [0.2, 1.0, 0.1]                        | 1.0                 | 1.0           |
| bagging_freq        | [1]                                    | 1                   | 1             |
| feature_fraction    | [0.2, 0.9, 0.1]                        | 0.4                 | 0.5           |

**Table S12** Comparison of LightGBM with other toxicity prediction models

| Featurization    | Model         | AUROC              | Accuracy           | F1                 | BACC               | MCC                |
|------------------|---------------|--------------------|--------------------|--------------------|--------------------|--------------------|
| off-target-based | RF            | 0.896±0.002        | 0.775±0.002        | 0.735±0.003        | 0.792±0.003        | 0.563±0.006        |
|                  | SVM           | 0.880±0.003        | 0.793±0.005        | 0.720±0.008        | 0.779±0.006        | 0.556±0.010        |
|                  | XGBoost       | 0.904±0.003        | 0.809±0.008        | 0.753±0.010        | 0.807±0.008        | 0.601±0.017        |
|                  | LightGBM      | <b>0.912±0.007</b> | <b>0.824±0.005</b> | <b>0.769±0.006</b> | <b>0.819±0.005</b> | <b>0.630±0.009</b> |
| structure-based  | ECFP_LightGBM | 0.774±0.010        | 0.705±0.009        | 0.618±0.009        | 0.694±0.008        | 0.381±0.015        |
|                  | STDNN-SE      | 0.883±0.006        | 0.789±0.014        | 0.749±0.013        | 0.783±0.012        | 0.569±0.026        |
|                  | DTox          | 0.738±0.039        | 0.703±0.022        | 0.560±0.065        | 0.666±0.038        | 0.344±0.067        |

\* Values in the table represent the mean  $\pm$  variance of the five-fold cross-training.

\* The optimal values for various metrics are indicated in bold.

**Table S13** Drugs and their associated ADRs

| <b>Pergolide</b>                |                                | <b>Sertindole</b>              | <b>Sibutramine</b>         |                           | <b>Phenylpropanolamine</b>         |
|---------------------------------|--------------------------------|--------------------------------|----------------------------|---------------------------|------------------------------------|
| Abdominal pain                  | Tremor                         | Headache                       | Angioedema                 | Hypersensitivity          | Anxiety                            |
| Dizziness                       | Anxiety                        | Insomnia                       | Urticaria                  | Suicidal ideation         | Arrhythmia                         |
| Weight increased                | Weight decreased               | Orthostatic hypotension        | Body temperature increased | Gastrointestinal disorder | Central nervous system stimulation |
| Asthenia                        | Insomnia                       | Sedation                       | Anxiety                    | Arrhythmia                | Neurotoxicity                      |
| Hypercholesterolaemia           | Muscle twitching               | Ejaculation disorder           | Cardiac failure congestive | Orthostatic hypotension   | Coordination abnormal              |
| Oedema peripheral               | Coordination abnormal          | Erectile dysfunction           | Salivary hypersecretion    | Ventricular tachycardia   | Electrocardiogram QT prolonged     |
| Diarrhoea                       | Dysphagia                      | Dizziness                      | Confusional state          | Constipation              | Constipation                       |
| Dyspepsia                       | Hypersomnia                    | Pallor                         | Dysphagia                  | Depression                | Confusional state                  |
| Memory impairment               | Tardive dyskinesia             | Anxiety                        | Dermatitis contact         | Anticholinergic syndrome  | Blood pressure increased           |
| Dyskinesia                      | Rash                           | Urinary retention              | Dizziness                  | Dysuria                   | Dizziness                          |
| Hypertension                    | Myoclonus                      | Increased appetite             | Headache                   | Cardiac arrest            | Hallucination                      |
| Dysuria                         | Tachycardia                    | Hyperglycaemia                 | Hypotension                | Nausea                    | Hypersensitivity                   |
| Constipation                    | Haematuria                     | Hyperprolactinaemia            | Nervousness                | Shock                     | Nausea                             |
| Extrapyramidal disorder         | Cardiac failure congestive     | Bone pain                      | Cerebrovascular disorder   | Tachycardia               | Nervousness                        |
| Body temperature increased      | Pulmonary hypertension         | Neuroleptic malignant syndrome | Urinary retention          | Oedema peripheral         | Psychotic disorder                 |
| Sleep disorder                  | Nervousness                    | Oedema                         | Increased appetite         | Sleep disorder            | Tachycardia                        |
| Headache                        | Pain                           | Galactorrhoea                  | Insomnia                   | Ureteral spasm            | Tremor                             |
| Akathisia                       | Palpitations                   | Dyskinesia                     | Dry skin                   |                           | Vomiting                           |
| Orthostatic hypotension         | Psychotic disorder             | Tardive dyskinesia             |                            |                           | Dysphoria                          |
| Heart rate increased            | Neuroleptic malignant syndrome | Dystonia                       |                            |                           | Serotonin syndrome                 |
| Intracranial pressure increased | Urinary incontinence           | Akathisia                      |                            |                           | Insomnia                           |
|                                 |                                | Parkinsonism                   |                            |                           | Sleep disorder                     |
|                                 |                                | Miosis                         |                            |                           | Sensitisation                      |
|                                 |                                | Sexual dysfunction             |                            |                           | Cardiac failure                    |
|                                 |                                | Tachycardia                    |                            |                           | Seizure                            |



**Table S18** Comparison of ML-based ADR prediction models

|                        | <b>AUROC</b>        | <b>mAP</b>          | <b>Rank loss</b>    |
|------------------------|---------------------|---------------------|---------------------|
| off-target-based MLKNN | <b>0.905±0.0008</b> | <b>0.389±0.0030</b> | <b>0.077±0.0006</b> |
| ECFP-based MLKNN       | 0.899±0.0006        | 0.345±0.0028        | 0.087±0.0008        |
| off-target-based RF    | 0.708±0.1460        | Not Applicable      | Not Applicable      |
| ECFP-based RF          | 0.659±0.1250        | Not Applicable      | Not Applicable      |

**Table S19** Molecular docking scores (kcal/mol) for pergolide and sertindole

| <b>Drug name</b> | <b>Target name</b> | <b>PDB id</b> | <b>Ref.</b> | <b>Docking score</b> |
|------------------|--------------------|---------------|-------------|----------------------|
| Pergolide        | SLC6A4             | 5I73          | [24, 25]    | <b>-8.752</b>        |
| Pergolide        | HTR7               | 7XTC          | [26]        | <b>-6.458</b>        |
| Sertindole       | CHRNA4             | 5KXI          | [27]        | <b>-6.789</b>        |
| Sertindole       | OPRK1              | 6B73          | [28]        | <b>-9.026</b>        |

## SI References

1. Bendels S, Bissantz C, Fasching B, Gerebtzoff G, Guba W, Kansy M, Migeon J, Mohr S, Peters JU, Tillier F *et al*: **Safety screening in early drug discovery: An optimized assay panel.** *J Pharmacol Toxicol Methods* 2019, **99**:106609.
2. Bowes J, Brown AJ, Hamon J, Jarolimek W, Sridhar A, Waldron G, Whitebread S: **Reducing safety-related drug attrition: the use of in vitro pharmacological profiling.** *Nat Rev Drug Discov* 2012, **11**(12):909-922.
3. Lynch JJ, 3rd, Van Vleet TR, Mittelstadt SW, Blomme EAG: **Potential functional and pathological side effects related to off-target pharmacological activity.** *J Pharmacol Toxicol Methods* 2017, **87**:108-126.
4. Krejsa CM, Horvath D, Rogalski SL, Penzotti JE, Mao B, Barbosa F, Migeon JC: **Predicting ADME properties and side effects: the BioPrint approach.** *Curr Opin Drug Discov Devel* 2003, **6**(4):470-480.
5. Rodgers G, Austin C, Anderson J, Pawlyk A, Colvis C, Margolis R, Baker J: **Glimmers in illuminating the druggable genome.** *Nat Rev Drug Discov* 2018, **17**(5):301-302.
6. Madjarov G, Kocev D, Gjorgjevikj D, Džeroski S: **An extensive experimental comparison of methods for multi-label learning.** *Pattern Recognition* 2012, **45**(9):3084-3104.
7. Zhang W, Liu F, Luo L, Zhang J: **Predicting drug side effects by multi-label learning and ensemble learning.** *BMC Bioinformatics* 2015, **16**:365.
8. Ke G, Meng Q, Finley T, Wang T, Chen W, Ma W, Ye Q, Liu T-Y: **Lightgbm: A highly efficient gradient boosting decision tree.** *Advances in neural information processing systems* 2017, **30**.
9. Akiba T, Sano S, Yanase T, Ohta T, Koyama M: **Optuna: A next-generation hyperparameter optimization framework.** In: *Proceedings of the 25th ACM SIGKDD international conference on knowledge discovery & data mining: 2019*, 2019: 2623-2631.
10. İlhan Topcu D, Can Cubukcu H: **Optimization of patient-based real-time quality control based on the Youden index.** *Clin Chim Acta* 2022, **534**:50-56.
11. Perlis ML, Corbitt CB, Kloss JD: **Insomnia research: 3Ps and beyond.** *Sleep Med Rev* 2014, **18**(3):191-193.
12. Hedlund PB, Huitron-Resendiz S, Henriksen SJ, Sutcliffe JG: **5-HT7 receptor inhibition and inactivation induce antidepressantlike behavior and sleep pattern.** *Biol Psychiatry* 2005, **58**(10):831-837.
13. Yamada J, Sugimoto Y, Yoshikawa T, Horisaka K: **Hyperglycemia induced by the 5-HT receptor agonist, 5-methoxytryptamine, in rats: involvement of the peripheral 5-HT2A receptor.** *Eur J Pharmacol* 1997, **323**(2-3):235-240.
14. Barth E, Albuszies G, Baumgart K, Matejovic M, Wachter U, Vogt J, Radermacher P, Calzia E: **Glucose metabolism and catecholamines.** *Crit Care Med* 2007, **35**(9 Suppl):S508-518.
15. Ghamari N, Zarei O, Arias-Montano JA, Reiner D, Dastmalchi S, Stark H, Hamzeh-Mivehroud M: **Histamine H(3) receptor antagonists/inverse agonists: Where do they go?** *Pharmacol Ther* 2019, **200**:69-84.
16. Flordellis C, Manolis A, Scheinin M, Paris H: **Clinical and pharmacological significance**

- of alpha2-adrenoceptor polymorphisms in cardiovascular diseases. *Int J Cardiol* 2004, **97**(3):367-372.
17. Walsh GM: **Emerging safety issues regarding long-term usage of H(1)receptor antagonists.** *Expert Opin Drug Saf* 2002, **1**(3):225-235.
  18. Wang W, MacKinnon R: **Cryo-EM Structure of the Open Human Ether-a-go-go-Related K(+) Channel hERG.** *Cell* 2017, **169**(3):422-430 e410.
  19. Mendez D, Gaulton A, Bento AP, Chambers J, De Veij M, Félix E, Magarinos MP, Mosquera JF, Mutowo P, Nowotka M *et al*: **ChEMBL: towards direct deposition of bioassay data.** *Nucleic Acids Res* 2019, **47**(D1):D930-D940.
  20. Kim S, Chen J, Cheng T, Gindulyte A, He J, He S, Li Q, Shoemaker BA, Thiessen PA, Yu B *et al*: **PubChem in 2021: new data content and improved web interfaces.** *Nucleic Acids Res* 2021, **49**(D1):D1388-D1395.
  21. Wishart DS, Feunang YD, Guo AC, Lo EJ, Marcu A, Grant JR, Sajed T, Johnson D, Li C, Sayeeda Z *et al*: **DrugBank 5.0: a major update to the DrugBank database for 2018.** *Nucleic Acids Res* 2018, **46**(D1):D1074-D1082.
  22. Kuhn M, Letunic I, Jensen LJ, Bork P: **The SIDER database of drugs and side effects.** *Nucleic Acids Res* 2016, **44**(D1):D1075-1079.
  23. Sterling T, Irwin JJ: **ZINC 15--Ligand Discovery for Everyone.** *J Chem Inf Model* 2015, **55**(11):2324-2337.
  24. Coleman JA, Green EM, Gouaux E: **X-ray structures and mechanism of the human serotonin transporter.** *Nature* 2016, **532**(7599):334-339.
  25. Ravna AW, Jaronczyk M, Sylte I: **A homology model of SERT based on the LeuT(Aa) template.** *Bioorg Med Chem Lett* 2006, **16**(21):5594-5597.
  26. Thirumaran SL, Lepailleur A, Rochais C: **Structure-activity relationships of serotonin 5-HT(7) receptors ligands: A review.** *Eur J Med Chem* 2019, **183**:111705.
  27. Morales-Perez CL, Noviello CM, Hibbs RE: **X-ray structure of the human alpha4beta2 nicotinic receptor.** *Nature* 2016, **538**(7625):411-415.
  28. Che T, Majumdar S, Zaidi SA, Ondachi P, McCorvy JD, Wang S, Mosier PD, Uprety R, Vardy E, Krumm BE *et al*: **Structure of the Nanobody-Stabilized Active State of the Kappa Opioid Receptor.** *Cell* 2018, **172**(1-2):55-67 e15.
